# Supplementary material for: The Adipose Microenvironment Dysregulates the Mammary Myoepithelial Cells and Could Participate to the Progression of Breast Cancer
Source: Front Cell Dev Biol. 2021 Jan 11;8:571948. doi: 10.3389/fcell.2020.571948 (PMC7829501; doi:10.3389/fcell.2020.571948)
Supplement: Supplementary file 1 [file Table_1.XLSX]

## Sheet: Sheet3
Table S1. List of the 145 metabolites annotated using in-house database
Annotations are based on accurate mass and retention time matching with those of pure authentic standards analyzed under identical LC-MS conditions.
C18(+): analyses performed using a C18 column and MS detection in the positive ion mode
HILIC(-): analyses performed using an HILIC column and MS detection in the negative ion mode
(*): metabolites that proved statistically significant (as included in Table 3)
LC-MS Conditions	Variable Name	m/z	Rention time (min)	In-house annotation
C18(+)	M283T99	283.103	1.65	O-Methylinosine
HILIC(-)	M115T119	115.04	1.98308	Oxovaleric acid
HILIC(-)	M144T212	144.067	3.53769	Acetamidobutanoic acid
HILIC(-)	M188T512	188.056	8.53	Acetyl-glutamic acid
HILIC(-)	M88T450	88.0404	7.49861	Alanine/Sarcosine/ß-Alanine
HILIC(-)	M175T516	175.047	8.60142	Allantoic acid
HILIC(-)	M157T449	157.037	7.4754	Allantoin*
HILIC(-)	M160T243	160.061	4.04909	Alpha-Aminoadipic acid
C18(+)	M104T52	104.071	0.87	aminobutyric-acid/Dimethylglycine
C18(+)	M131T79_24	131.118	1.32	Amino-diethylacetamide/DL-Leucinamide
HILIC(-)	M151T382	151.061	6.37245	Arabitol/Adonitol
HILIC(-)	M173T626	173.104	10.4295	Arginine
C18(+)	M133T56	133.061	0.93	Asparagine/3-Ureidopropionic acid*
C18(+)	M281T260	281.112	4.33	Aspartyl-Phenylalanine
HILIC(-)	M121T128	121.029	2.13945	Benzoic acid/4-Hydroxybenzaldehyde
HILIC(-)	M243T348	243.062	5.80226	beta-Pseudouridine*
HILIC(-)	M225T482	225.099	8.02582	Carnosine
HILIC(-)	M129T480	129.019	7.9969	Citraconic acid/Glutaconic acid/Itaconic acid/Mesaconic acid
HILIC(-)	M191T614	191.02	10.2261	Citric acid/Isocitric acid
HILIC(-)	M174T498	174.088	8.30563	Citrulline
HILIC(-)	M130T472	130.062	7.87008	Creatine
HILIC(-)	M112T198	112.052	3.29861	Creatinine
HILIC(-)	M221T546	221.06	9.10102	Cystathionine
HILIC(-)	M120T540	120.012	9.00379	Cysteine
HILIC(-)	M200T596	199.969	9.92852	Cysteine S-sulfate
HILIC(-)	M239T539	239.017	8.98637	Cystine
HILIC(-)	M171T86	171.139	1.4379	Decanoic acid*
C18(+)	M228T52	228.097	0.86	Deoxycytidine
C18(+)	M129T76	129.066	1.27	Dihydrothymine
HILIC(-)	M341T548	341.109	9.13319	disaccharides
HILIC(-)	M301T80_1	301.217	1.32654	Eicosapentaenoic acid*
HILIC(-)	M305T79	305.249	1.31824	Eicosatrienoic acid*
HILIC(-)	M121T304	121.051	5.06369	Erythritol/Threitol
C18(+)	M442T279	442.146	4.65	Folic-acid
HILIC(-)	M115T553	115.004	9.21566	Fumaric acid/Maleic acid
HILIC(-)	M193T556	193.035	9.27452	Galacturonic acid
HILIC(-)	M195T486	195.051	8.10338	Gluconic acid/Galactonic acid
HILIC(-)	M177T479	177.04	7.97728	Gluconolactone
HILIC(-)	M193T482	193.035	8.02978	Glucuronic acid
HILIC(-)	M175T527	175.025	8.77816	Glucuronic acid gamma-lactone
HILIC(-)	M146T525	146.046	8.75621	Glutamic acid*
HILIC(-)	M145T468	145.062	7.8064	Glutamine
C18(+)	M466T488	466.315	8.13	Glycocholic-acid
C18(+)	M450T542	450.32	9.04	glycodeoxycholate/glycochenodeoxycholic-acid/Glycoursodeoxycholic-acid
C18(+)	M118T54	118.061	0.9	Guanidineacetic-acid
C18(+)	M146T54	146.092	0.9	Guanidinobutyric-acid
C18(+)	M176T50	176.068	0.83	Guanidinosuccinic-acid
HILIC(-)	M115T101	115.076	1.68198	Hexanoic acid*
HILIC(-)	M179T468	179.056	7.79586	Hexose
C18(+)	M180T295	180.065	4.91	Hippuric-acid
HILIC(-)	M154T440	154.062	7.33898	Histidine
HILIC(-)	M118T434	118.051	7.22735	Homoserine/Threonine/D-allo-Threonine
HILIC(-)	M181T201	181.051	3.3569	Homovanillic acid/-Hydroxyphenyllactic acid
HILIC(-)	M117T203	117.056	3.3772	Hydroxy-2-methyl butanoic acid (HMBA)*
HILIC(-)	M103T245	103.04	4.08763	Hydroxybutanoic acid*
HILIC(-)	M147T533	147.03	8.8785	Hydroxyglutaric acid*
HILIC(-)	M271T80	271.228	1.33763	Hydroxyhexadecanoic acid*
HILIC(-)	M131T112	131.071	1.87403	Hydroxyhexanoic acid*
C18(+)	M192T285	192.065	4.74	Hydroxyindoleacetic-acid
C18(+)	M163T39	163.107	0.65	Hydroxylysine
HILIC(-)	M263T209	263.023	3.48646	Hydroxy-methoxyphenylglycol sulfate
HILIC(-)	M117T144	117.056	2.40494	Hydroxymethylbutyric acid/Hydroxypentanoic acid
C18(+)	M165T69	165.054	1.15	Hydroxyphenyllactic-acid/Aminopropanoic
C18(+)	M221T91	221.091	1.52	hydroxytryptophan
HILIC(-)	M135T253	135.031	4.22251	Hypoxanthine*
C18(+)	M176T360	176.07	5.99	Indoleacetic-acid
HILIC(-)	M212T153	212.002	2.54456	Indoxyl sulfate
HILIC(-)	M87T154	87.0451	2.57345	Isobutyric acid
C18(+)	M132T79_18	132.102	1.32	Isoleucine/Leucine/DL-beta-Leucine/6-Aminocaproic-acid/Norleucine
C18(+)	M190T273	190.049	4.55	Kynurenic-acid
C18(+)	M209T123	209.091	2.04	Kynurenine
HILIC(-)	M89T240	89.0244	4.00045	Lactic acid*
HILIC(-)	M145T600	145.098	9.99392	Lysine
HILIC(-)	M133T556	133.014	9.27028	Malic acid/Pyruvic acid/Diglycolic acid
HILIC(-)	M181T441	181.072	7.35515	Mannitol/Dulcitol
HILIC(-)	M148T235	148.044	3.92101	Methionine*
C18(+)	M166T49	166.053	0.82	Methionine-sulfoxide
C18(+)	M206T371	206.081	6.19	Methoxyindoleacetate/Indolelactic-acid/Cinnamoylglycine
C18(+)	M282T52	282.119	0.87	Methyladenosine
C18(+)	M194T325	194.081	5.41	Methylhippuric-acid/Phenylacetylglycine-(Phenylacetylamino-acetic-acid)
HILIC(-)	M168T339	168.078	5.65363	Methylhistidine
C18(+)	M170T49	170.092	0.81	Methylhistidine/Histidine-methyl-ester
C18(+)	M141T51	141.066	0.85	Methylimidazoleacetic-acid
C18(+)	M137T48	137.071	0.81	Methylnicotinamide
HILIC(-)	M129T101	129.056	1.68942	Methyloxopentanoic acid/3-Methyl-2-oxovaleric acid*
C18(+)	M133T163	133.049	2.72	Methyl-succinic-acid/mono-Methyl-hydrogen-succinate/Ehtylmalonic-acid
C18(+)	M257T376	257.012	6.27	Methylumbelliferyl-sulfate
HILIC(-)	M147T154	147.066	2.5745	Mevalonic acid
C18(+)	M161T334	161.08	5.57	mono-Methyl-adipate
C18(+)	M115T163	115.039	2.72	mono-Methyl-hydrogen-succinate
C18(+)	M252T57	252.108	0.94	Muramic-acid
HILIC(-)	M179T570	179.056	9.49782	Myo-inositol*
C18(+)	M298T90	298.114	1.5	N2-Methylguanosine/2-O-Methylguanosine
C18(+)	M286T115	286.102	1.91	N4-Acetylcytidine
C18(+)	M188T46	188.175	0.77	N8-Acetylspermidine
HILIC(-)	M158T129	158.082	2.15522	N-acetyl-DL-norvaline/N-acetyl-DL-Valine
C18(+)	M247T373	247.107	6.21	N-acetyl-DL-tryptophan
HILIC(-)	M116T262	116.035	4.35982	N-Acetylglycine
C18(+)	M208T343	208.096	5.72	N-Acetyl-L-phenylalanine
HILIC(-)	M308T473	308.099	7.88235	N-Acetylneuraminic acid
HILIC(-)	M173T413	173.093	6.87932	N-Acetyl-ornithine
HILIC(-)	M146T307	146.046	5.11721	N-Acetylserine*
HILIC(-)	M324T506	324.094	8.43964	N-Glycolylneuraminic acid
HILIC(-)	M121T132	121.041	2.19359	Nicotinamide
HILIC(-)	M154T154	154.014	2.56356	Nitrocatechol
HILIC(-)	M157T87	157.123	1.4576	Nonanoic acid*
HILIC(-)	M281T80	281.249	1.32802	Octadecenoic acid*
HILIC(-)	M194T206	194.046	3.42702	o-Hydroxyhippuric
HILIC(-)	M131T572	131.083	9.53342	Ornithine
C18(+)	M182T122	182.081	2.04	o-Tyrosine
C18(+)	M206T148_2	206.138	2.46	Panthenol
C18(+)	M220T146	220.117	2.44	Pantothenic-acid
C18(+)	M166T122_11	166.086	2.04	Phenylalanine
HILIC(-)	M159T429	159.066	7.15423	Pimelic acid/Dimethylglutaric acid/Methyladipic acid
C18(+)	M130T43	130.086	0.72	Pipecolinic-acid
HILIC(-)	M114T374	114.056	6.23288	Proline
HILIC(-)	M182T99	182.046	1.65816	Pyridoxic acid
C18(+)	M170T61	170.081	1.02	Pyridoxine
HILIC(-)	M128T274	128.035	4.57253	Pyroglutamic acid
HILIC(-)	M87T615	87.0087	10.2547	Pyruvic acid
HILIC(-)	M166T527	166.014	8.78239	Quinolinic acid
C18(+)	M377T312	377.144	5.19	Riboflavin
HILIC(-)	M104T480	104.035	7.99446	Serine*
C18(+)	M160T100	160.075	1.66	Serotonin-hydrochloride
C18(+)	M133T62	133.032	1.04	S-ethyl-L-cysteine
HILIC(-)	M117T533	117.019	8.88174	Succinic acid/Methylmalonic acid
HILIC(-)	M341T505	341.109	8.4243	Sucrose
HILIC(-)	M217T583	216.981	9.71173	Sulfosalicylic acid
HILIC(-)	M124T458	124.007	7.63065	Taurine
C18(+)	M516T459	516.297	7.66	Taurocholic-acid
C18(+)	M500T503	500.303	8.39	Taurodeoxycholic-acid/Taurochenodeoxycholic-acid
HILIC(-)	M135T422	135.03	7.0376	Threonic acid*
HILIC(-)	M241T133	241.083	2.22137	Thymidine*
C18(+)	M323T63	323.064	1.06	Thymidine-5-monophosphate
HILIC(-)	M125T134	125.036	2.23624	Thymine*
C18(+)	M778T483	777.691	8.05	Thyroxine
HILIC(-)	M213T82	213.186	1.36863	Tridecanoic acid
HILIC(-)	M503T587	503.162	9.79078	trisaccharides
C18(+)	M205T248	205.097	4.14	Tryptophan
HILIC(-)	M180T333	180.067	5.55593	Tyrosine/3-Amino-3-(4-hydroxyphenyl)propanoic
HILIC(-)	M111T168	111.02	2.79716	Uracil*
C18(+)	M245T63	245.076	1.05	Uridine/beta-Pseudouridine
HILIC(-)	M116T308	116.072	5.13475	Valine
HILIC(-)	M151T341	151.026	5.68319	Xanthine
C18(+)	M285T91	285.082	1.51	Xanthosine
